# Supplementary material for: Korean Traditional Medicine in Treating Patients with Mild Cognitive Impairment: A Multicenter Prospective Observational Case Series
Source: Hindawi journal article supplement (doi:10.1155/2020/4323989), 2020-01-01
Supplement: f1 [file 4323989.f1.pdf]

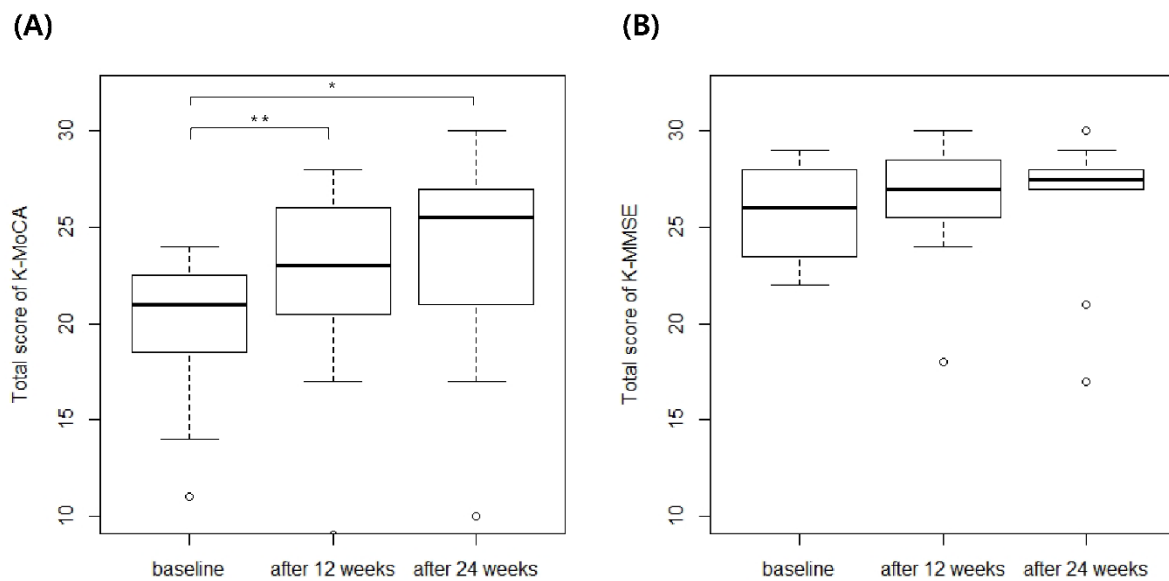

**Supplementary Fig. S1.** Changes in total scores of the Korean-Montreal Cognitive Assessment (K-MoCA) and the Korean-Mini Mental State Examination (K-MMSE)

(A) Total score of the K-MoCA increased after (12 and 24) weeks of treatment, compared to the baseline ( $p=0.015$ ,  $p=0.008$ , respectively). (B) Total mean score of the K-MMSE tends to slightly increase after (12 and 24) weeks of treatment compared to the baseline, but it was not statistically significant ( $p=0.195$ ,  $p=0.761$ , respectively). \*:  $P<0.05$  compared with the score at the baseline by the Student's paired t-test, \*\*:  $P<0.001$  compared with the score at the baseline by the Student's paired t-test.

**Supplementary Table S1.** Detailed descriptions of the Korean medicine treatment used in this study.

| Herbal formulae/dosage, acupuncture point                                |                                                                                                                                                                                                                                                                                                                                                                                                                                                                                                                                                                                                                                                                                                                                                                    |
|--------------------------------------------------------------------------|--------------------------------------------------------------------------------------------------------------------------------------------------------------------------------------------------------------------------------------------------------------------------------------------------------------------------------------------------------------------------------------------------------------------------------------------------------------------------------------------------------------------------------------------------------------------------------------------------------------------------------------------------------------------------------------------------------------------------------------------------------------------|
| Herbal medicine                                                          |                                                                                                                                                                                                                                                                                                                                                                                                                                                                                                                                                                                                                                                                                                                                                                    |
| Decoction (water extract) <sup>a</sup>                                   |                                                                                                                                                                                                                                                                                                                                                                                                                                                                                                                                                                                                                                                                                                                                                                    |
| <b><i>Tonifying-Qi formula</i></b>                                       |                                                                                                                                                                                                                                                                                                                                                                                                                                                                                                                                                                                                                                                                                                                                                                    |
| - modified<br>Jeungsonbaekchul-san &<br>Gakbyeongyeonsu-tang             | Ginseng Radix, Achyranthis Radix, Citri Unshius Pericarpium, Crataegi Fructus, Pueraria Root, Atractylodis Rhizoma Alba, Paeoniae Radix, Poria Sclerotium, Angelicae Gigantis Radix, Agastachis Herba, <u>Acori Graminei Rhizoma</u> , <u>Poria Sclerotium Cum Pini Radix</u> 4g, <u>Polygalae Radix</u> , <u>Aucklandiae Radix</u> , <u>Glycyrrhizae Radix et Rhizoma</u> 2 g, <u>Zingiberis Rhizoma Recens</u> 6 g. 120 mL, tid.                                                                                                                                                                                                                                                                                                                                 |
| - modified Guibi-tang<br>(Guipi-tang, Kihi-to)                           | Longan Arillus, Zizyphi Semen 12 g, Zingiberis Rhizoma Recens 8 g, Angelicae Gigantis Radix, Zizyphi Fructus 6 g, Astragali Radix, Ginseng Radix, Atractylodis Rhizoma Alba, <u>Acori Graminei Rhizoma</u> , <u>Massa Medicata Fermentata</u> , <u>Poria Sclerotium Cum Pini Radix</u> , <u>Crataegi Fructus</u> 4g, <u>Aucklandiae Radix</u> , <u>Polygalae Radix</u> , <u>Glycyrrhizae Radix et Rhizoma</u> 2 g. 120 mL, tid.                                                                                                                                                                                                                                                                                                                                    |
| <b><i>Tonifying-Kidney formula</i></b>                                   |                                                                                                                                                                                                                                                                                                                                                                                                                                                                                                                                                                                                                                                                                                                                                                    |
| - modified<br>Jaeumganghwa-tang<br>(Ziyangjianghuo-tang,<br>Jinkoka-to)  | Paeoniae Radix, <u>Acori Graminei Rhizoma</u> , <u>Poria Sclerotium Cum Pini Radix</u> , <u>Longan Arillus</u> 6 g, Angelicae Gigantis Radix 5g, Rehmanniae Radix Preparata, Liriopsis seu Ophiopogonis Tuber, Atractylodis Rhizoma Alba, <u>Bupleuri Radix</u> , <u>Massa Medicata Fermentata</u> 4 g, Rehmanniae Radix Recens, Citri Unshius Pericarpium 3 g, Anemarrhenae Rhizoma, Phellodendri Cortex, <u>Glycyrrhizae Radix et Rhizoma</u> 2 g. 120 mL, tid.                                                                                                                                                                                                                                                                                                  |
| - modified<br>Yukmijihwang-hwan<br>(Liuweidihuang-tang,<br>Rokumijjo-to) | (variation 1) Rehmanniae Radix Preparata, <u>Longan Arillus</u> 12 g, Corni Fructus, Dioscoreae Rhizoma 8 g, Moutan Radicis Cortex, Poria Sclerotium, Alismatis Rhizoma 6g, <u>Acori Graminei Rhizoma</u> , <u>Massa Medicata Fermentata</u> 4 g, <u>Anemarrhenae Rhizoma</u> , <u>Alpiniae Oxyphyllae Fructus</u> , <u>Phellodendri Cortex</u> , <u>Polygalae Radix</u> 2 g. 120 mL, tid.<br><br>(variation 2) Rehmanniae Radix Preparata 12 g, Corni Fructus, Dioscoreae Rhizoma, 8 g, Moutan Radicis Cortex, <u>Polygalae Radix</u> , <u>Longan Arillus</u> , <u>Poria Sclerotium Cum Pini Radix</u> , Poria Sclerotium, Alismatis Rhizoma 6 g, Atractylodis Rhizoma Alba, Acori Graminei Rhizoma, Massa Medicata Fermentata, Astragali Radix 4 g. 120 mL, tid. |
| - modified Gojineumja<br>(Guzhenyinzi)                                   | <u>Poria Sclerotium Cum Pini Radix</u> 8 g, Rehmanniae Radix Preparata, Acori Graminei Rhizoma 6 g, Ginseng Radix, Astragali Radix, <u>Gardeniae Fructus</u> , Dioscoreae Rhizoma, Angelicae Gigantis Radix, <u>Galli Gigeriae Endothelium Corneum</u> 4 g, Citri Unshius Pericarpium, Eucommiae Cortex, Poria Sclerotium, <u>Glycyrrhizae Radix et Rhizoma</u> 3 g, Atractylodis Rhizoma Alba, Corni Fructus, Phellodendri Cortex, Alismatis Rhizoma, Psoraleae Semen, <u>Polygalae Radix</u> 2 g. 120 mL, tid.                                                                                                                                                                                                                                                   |
| <b><i>Calming-Liver formula</i></b>                                      |                                                                                                                                                                                                                                                                                                                                                                                                                                                                                                                                                                                                                                                                                                                                                                    |
| - modified Ondam-tang<br>(Wendan-tang, untan-to)                         | Cyperis Rhizoma, Pinelliae Tuber 10 g, <u>Crataegi Fructus</u> , Zingiberis Rhizoma Recens 8 g, Citri Unshius Pericarpium, Zizyphi Fructus 6 g, Phyllostachyos Caulis in Taeniam, Poria Sclerotium, Liriopsis seu Ophiopogonis Tuber, Ponciri Fructus Immaturus, Ginseng Radix, <u>Bupleuri Radix</u> , <u>Acori Graminei Rhizoma</u> , <u>Poria Sclerotium Cum Pini Radix</u> , <u>Massa Medicata Fermentata</u> , <u>Glycyrrhizae Radix et Rhizoma</u> 4 g, <u>Platycodonis Radix</u> 3 g, <u>Polygalae Radix</u> 2 g. 120 mL, tid.                                                                                                                                                                                                                              |

- |                                                                       |                                                                                                                                                                                                                                                                                                                                                                                                                                                                                                                                                                                                                                                                                                |
|-----------------------------------------------------------------------|------------------------------------------------------------------------------------------------------------------------------------------------------------------------------------------------------------------------------------------------------------------------------------------------------------------------------------------------------------------------------------------------------------------------------------------------------------------------------------------------------------------------------------------------------------------------------------------------------------------------------------------------------------------------------------------------|
| <p>- modified Soyo-san<br/>(Jiaweixiaoyao-san,<br/>Kamishoyo-san)</p> | <p><u>Cyperi Rhizoma</u> 10 g, <u>Acori Graminei Rhizoma</u>, <u>Poria Sclerotium Cum Pini Radix</u>, <u>Cinnamomi Ramulus</u>, <u>Zingiberis Rhizoma Recens</u> 8 g, <u>Atractylodis Rhizoma Alba</u>, <u>Massa Medicata Fermentata</u>, <u>Paeoniae Radix</u>, <u>Crataegi Fructus</u> 6 g, <u>Poria Sclerotium</u>, <u>Angelicae Gigantis Radix</u>, <u>Curcumae Radix</u>, <u>Citri Unshius Pericarpium Immaturus</u>, <u>Bupleuri Radix</u>, <u>Liriopis seu Ophiopogonis Tuber</u>, <u>Meliae Fructus</u> 4 g, <u>Menthae Herba</u>, <u>Gardeniae Fructus</u>, <u>Polygalae Radix</u>, <u>Glycyrrhizae Radix et Rhizoma</u> 2 g. 120 mL, tid.</p>                                        |
| <p>- modified Daeyoung-jeon<br/>(Daying-jian, Taiei-sen)</p>          | <p><u>Uncariae Ramulus cum Uncus</u> 12 g, <u>Rehmanniae Radix Preparata</u>, <u>Atractylodis Rhizoma</u> 8 g, <u>Cervi Cornu</u>, <u>Lycii Fructus</u>, <u>Angelicae Gigantis Radix</u>, <u>Eucommiae Cortex</u>, <u>Amomi Fructus</u>, <u>Achyranthis Radix</u>, <u>Cinnamomi Cortex</u>, <u>Citri Unshius Pericarpium</u>, <u>Pinelliae Tuber</u> 6 g, <u>Rehmanniae Radix</u>, <u>Glycyrrhizae Radix et Rhizoma</u>, <u>Zingiberis Rhizoma</u>, <u>Platycodonis Radix</u>, <u>Persicae Semen</u>, <u>Hordei Fructus Germinatus</u>, <u>Paeoniae Radix</u>, <u>Arecae Semen</u>, <u>Magnoliae Cortex</u> 4 g, <u>Angelicae Dahuricae Radix</u>, <u>Cnidii Rhizoma</u> 2 g. 120 mL, bid.</p> |

---

Granules (manufactured)

---

***Tonifying-Qi formula***

- |                                                                   |                                                                                                                                                                                                                                                                                                                                                                  |
|-------------------------------------------------------------------|------------------------------------------------------------------------------------------------------------------------------------------------------------------------------------------------------------------------------------------------------------------------------------------------------------------------------------------------------------------|
| <p>- Bojungikgi-tang<br/>(Buzhongyiqi-tang,<br/>Hochuekki-to)</p> | <p><u>Astragali Radix</u>, <u>Atractylodis Rhizoma</u>, <u>Ginseng Radix</u> 1 g, <u>Angelicae Gigantis Radix</u> 0.75 g, <u>Bupleuri Radix</u>, <u>Zizyphi Fructus</u>, <u>Citri Unshius Pericarpium</u> 0.5 g, <u>Glycyrrhizae Radix et Rhizoma</u> 0.375g, <u>Cimicifugae Rhizoma</u> 0.25 g, <u>Zingiberis Rhizoma</u> 0.125 g. 1.875 g of granule, tid.</p> |
|-------------------------------------------------------------------|------------------------------------------------------------------------------------------------------------------------------------------------------------------------------------------------------------------------------------------------------------------------------------------------------------------------------------------------------------------|

***Tonifying-Kidney formula***

- |                                                                      |                                                                                                                                                                                                                                                                                                                                   |
|----------------------------------------------------------------------|-----------------------------------------------------------------------------------------------------------------------------------------------------------------------------------------------------------------------------------------------------------------------------------------------------------------------------------|
| <p>- Uchashinki-hwan<br/>(Jishengshenqi-wan,<br/>Goshajinki-gan)</p> | <p><u>Rehmanniae Radix</u> 1.7 g, <u>Achyranthis Radix</u>, <u>Corni Fructus</u>, <u>Dioscoreae Rhizoma</u>, <u>Plantaginis Semen</u>, <u>Alismatis Rhizoma</u>, <u>Poria Sclerotium</u>, <u>Moutan Radicis Cortex</u> 1.0 g, <u>Cinnamomi Cortex</u>, <u>Aconiti Lateralis Radix Preparata</u> 0.3 g. 2.5 g of granule, tid.</p> |
|----------------------------------------------------------------------|-----------------------------------------------------------------------------------------------------------------------------------------------------------------------------------------------------------------------------------------------------------------------------------------------------------------------------------|

***Calming-Liver formula***

- |                                                 |                                                                                                                                                                                                                                                                                                                                           |
|-------------------------------------------------|-------------------------------------------------------------------------------------------------------------------------------------------------------------------------------------------------------------------------------------------------------------------------------------------------------------------------------------------|
| <p>- Ukgan-san<br/>(Yigan-san, Yokukan-san)</p> | <p><u>Pinelliae Tuber</u> 1.67 g, <u>Atractylodis Rhizoma Alba</u>, <u>Poria Sclerotium</u> 1.33 g, <u>Angelicae Gigantis Radix</u>, <u>Uncariae Ramulus cum Uncus</u>, <u>Cnidii Rhizoma</u>, <u>Citri Unshius Pericarpium</u> 1.0 g, <u>Bupleuri Radix</u> 0.67 g, <u>Glycyrrhizae Radix et Rhizoma</u> 0.5 g. 3 g of granule, tid.</p> |
|-------------------------------------------------|-------------------------------------------------------------------------------------------------------------------------------------------------------------------------------------------------------------------------------------------------------------------------------------------------------------------------------------------|

---

|                    |                                                                                                                                 |
|--------------------|---------------------------------------------------------------------------------------------------------------------------------|
| Acupuncture        | GV20, GV24, EX-HN3, CV12, TE4, TE5, GB40, GB37, KI4 (in A hospital)<br>EX-HN1, CV12, ST22, ST25, LI4, LR3, ST36 (in B hospital) |
| Electroacupuncture | GV20, GV24, EX-HN3, CV12, TE4, TE5, GB40, GB37, KI4                                                                             |
| Pharmacopuncture   | placenta-pharmacopuncture on CV3                                                                                                |
| Cupping            | Bladder Meridian-first line of upper back, GB21, BL23                                                                           |
| Moxibustion        | CV12                                                                                                                            |

---

<sup>a</sup> Herbs added to the standard formulae are underlined.
